# Supplementary material for: Two Drinking Water Outbreaks Caused by Wastewater Intrusion Including Sapovirus in Finland
Source: PubMed Central journal article supplement (PMC6888097; doi:10.3390/ijerph16224376), 2019-11-09
Supplement: ijerph-16-04376-s001.pdf [file ijerph-16-04376-s001.pdf]

**Table S1.** Secondary concentration procedures for target microbes analyzed with the DEUF method.

| Secondary concentration procedure                                  | Target microbes                                                                                                                                                                  | Outbreak    |
|--------------------------------------------------------------------|----------------------------------------------------------------------------------------------------------------------------------------------------------------------------------|-------------|
| Direct analysis of DEUF eluate                                     | <i>E. coli</i> , coliform bacteria,<br><i>Clostridium perfringens</i>                                                                                                            | Outbreak I  |
| Millipore Express PLUS membrane filtration                         | <i>Giardia lamblia</i> , <i>Entamoeba histolytica</i> , <i>Cryptosporidium</i> spp. and <i>Dientamoeba fragilis</i> , GenBac3 (rDNA), GenBac3 (rRNA), HF183 (rDNA), HF183 (rRNA) | Outbreak I  |
| PEG precipitation after Millipore Express PLUS membrane filtration | Sapovirus, adenovirus                                                                                                                                                            | Outbreak I  |
| Direct analysis of DEUF eluate                                     | <i>Clostridium perfringens</i>                                                                                                                                                   | Outbreak II |
| Nuclepore polycarbonate (PC) filtration                            | ETEC, EPEC, EHEC and EAEC, <i>Giardia</i> spp. and <i>Cryptosporidium</i> spp., GenBac3 (rDNA), GenBac3 (rRNA), HF183 (rDNA), HF183 (rRNA)                                       | Outbreak II |
| Direct PEG precipitation                                           | Sapovirus                                                                                                                                                                        | Outbreak II |
